# Supplementary material
Source: PubMed Central journal article supplement (PMC8811655)

**Full unedited gel for Figure 4A**

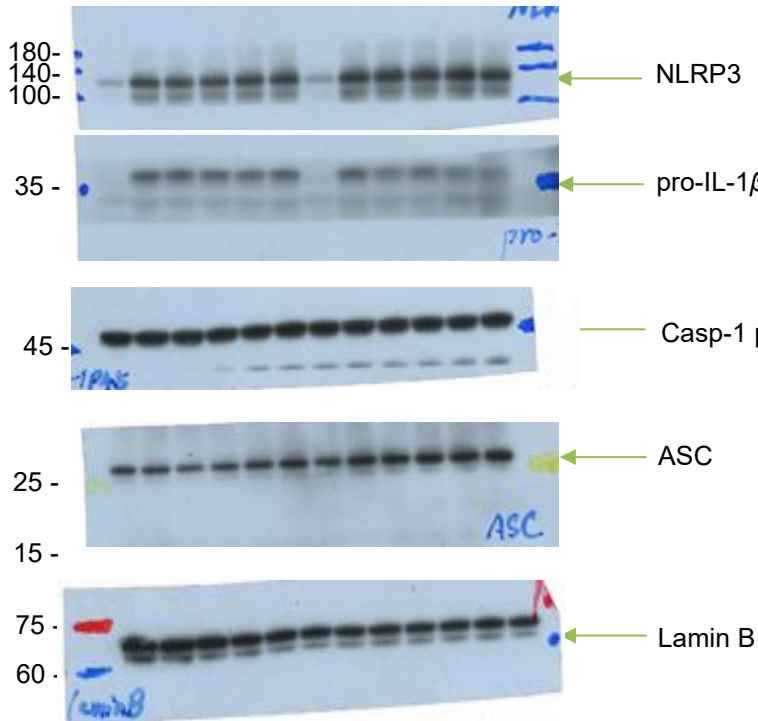

**Full unedited gel for Figure 4J**

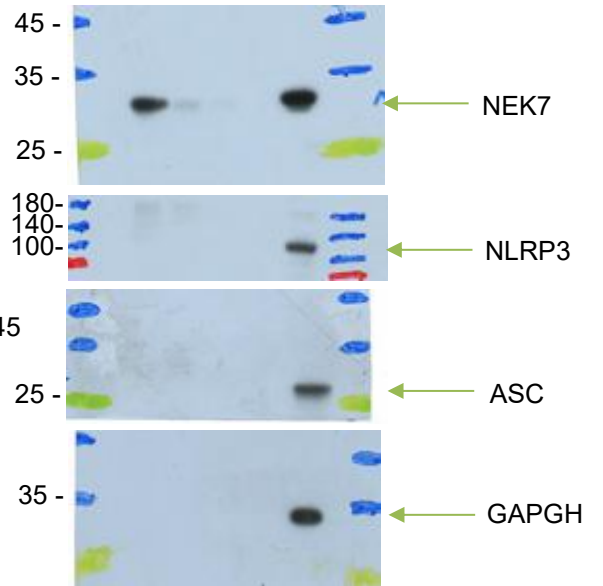

**Full unedited gel for Figure 4I**

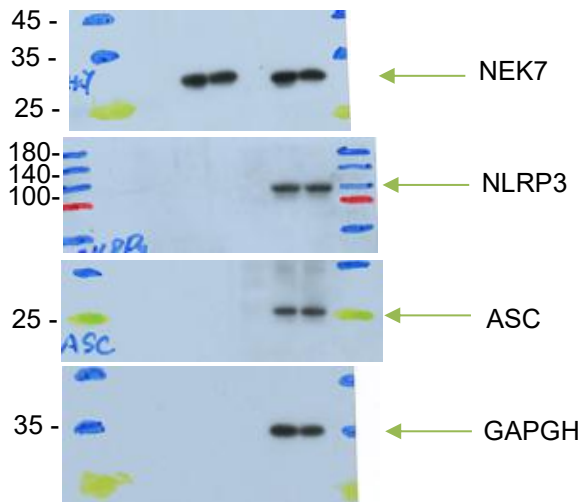

**Full unedited gel for Figure 4K**

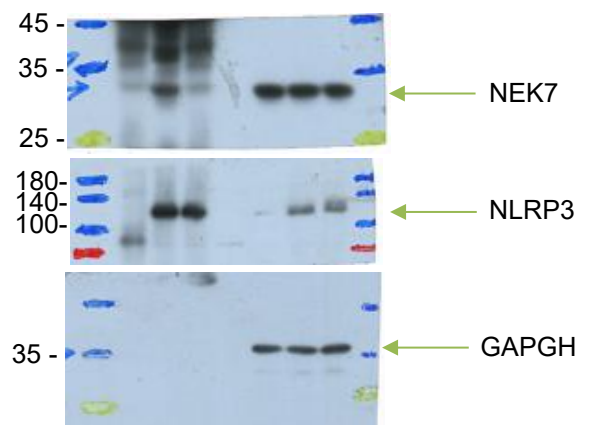

Supplement: EMBR-23-e53499-s004.pdf [file EMBR-23-e53499-s004.pdf]
