# Supplementary material
Source: PubMed Central journal article supplement (PMC8811655)
Supplement: EMBR-23-e53499-s007.pdf [file EMBR-23-e53499-s007.pdf]

## Expanded View Figures

### Figure EV1. Licochalcone B inhibits NLRP3 inflammasome activation.

- A BMDMs were primed with LPS for 4 h and then treated with LicoB 1 h prior to stimulation of nigericin for 45 min. Activity of caspase-1 in culture supernatants of BMDMs were shown.
- B, C BMDMs were primed with LPS for 4 h and then treated with LicoB for 1 h, prior to stimulation with nigericin for 45 min or ATP for 1 h. Western blot analyses of GSDMD, pro-caspase-1 (p45), pro-IL-1 $\beta$ , NLRP3 and ASC in the whole cell lysate (WCL); activated caspase-1 (p20) and cleaved IL-1 $\beta$  (p17) in the culture SN of BMDMs. Coomassie Blue staining was used as the SN loading control, while lamin B was used as the lysate loading control.
- D–F PMA-primed THP-1 cells were treated with LicoB 1 h prior to stimulation with nigericin for 45 min. Western blot analyses of pro-caspase-1 (p45), pro-IL-1 $\beta$ , NLRP3 and ASC in the WCL; and activated caspase-1 (p20) and cleaved IL-1 $\beta$  (p17) (D) in the culture supernatants (SN) of THP-1 cells. Caspase-1 activity (E) and IL-1 $\beta$  secretion (F) in the SN were measured.
- G, H Human PBMCs were primed with LPS for 4 h and then treated with LicoB 1 h prior to stimulation with nigericin for 45 min (G) or with ATP for 1 h (H). Caspase-1 activity in supernatant was measured.

Data information: Error bars, mean  $\pm$  SEM from three biological replicates. \* $P$  < 0.05, \*\* $P$  < 0.01, \*\*\* $P$  < 0.001 and n.s.: not significant (one-way ANOVA with Dunnett's *post hoc* test).

Source data are available online for this figure.

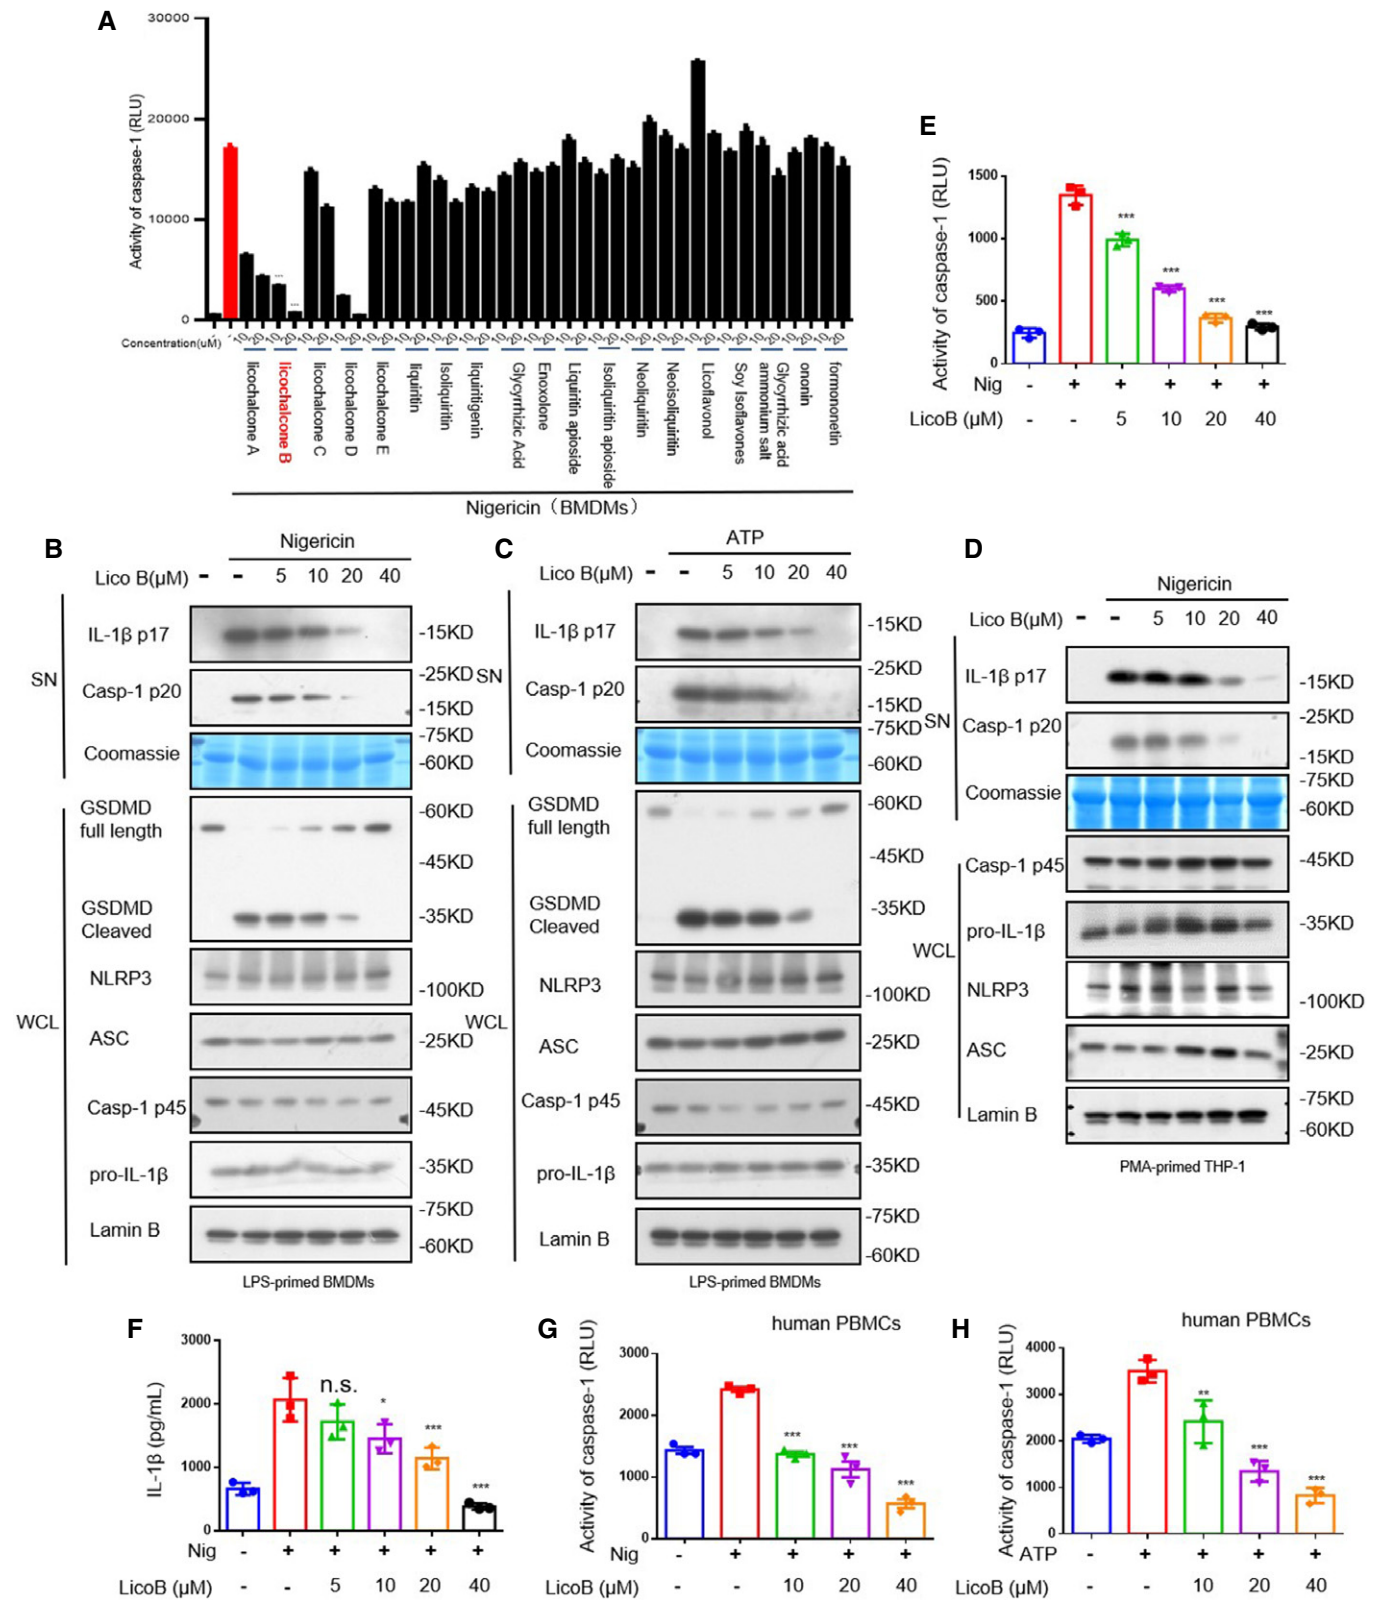

Figure EV1.

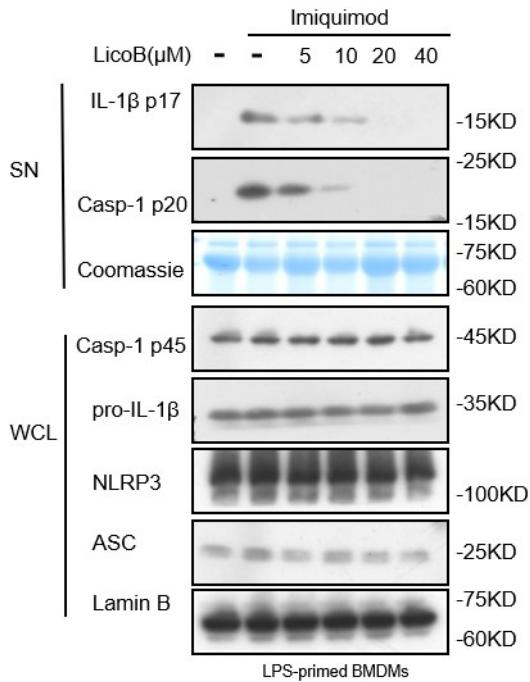

**Figure EV2. Licochalcone B inhibits K<sup>+</sup> Efflux-Independent NLRP3 Inflammasome Activation in BMDMs.**

BMDMs were primed with LPS for 4 h and then treated with LicoB for 1 h prior to stimulation with imiquimod (70  $\mu$ M) for 1 h. Western blot analyses of pro-caspase-1 (p45), pro-IL-1 $\beta$ , NLRP3 and ASC in the whole cell lysate (WCL); activated caspase-1 (p20) and cleaved IL-1 $\beta$  (p17) in the culture SN of BMDMs were shown. Coomassie Blue staining was used as the SN loading control, while lamin B was used as the lysate loading control.

Source data are available online for this figure.

**Figure EV3. Licochalcone B directly binds to NEK7 but does not affect the kinase activity of NEK7.**

- A Cell lysates of PMA-primed THP-1 treated with nigericin or not were incubated with sepharose or LicoB-sepharose. The pull-down samples and input were analysed by Western blot.
- B Cell lysates of PMA-primed THP-1 were incubated with sepharose or LicoB-sepharose in the presence of different concentrations of free LicoB (0.5 and 1 mM). The pull-down samples and input were analysed by Western blot.
- C Cell lysates of LPS-primed hPBMCs treated with nigericin or not were incubated with sepharose or LicoB-sepharose. The pull-down samples and input were analysed by Western blot.
- D Cell lysates of LPS-primed hPBMCs were incubated with sepharose or LicoB-sepharose in the presence of different concentrations of free LicoB (0.5 and 1 mM). The pull-down samples and input were analysed by Western blot.
- E NEK7 was incubated with  $\beta$ -casein and ATP in the presence of different concentrations of LicoB. NEK7 kinase activity was measured using an ADP-based phosphatase coupled kinase assay.
- F Cell lysates of LPS-primed BMDMs treated with nigericin or not were incubated with Sepharose, Sepharose-LicoA or Sepharose-LicoB. The pull-down samples and input were analysed by Western blot.
- G, H Human monocytes were treated with LicoB for 1 h, prior to stimulation with LPS (200 ng/ml) for 14 h. (G) Western blot analyses of pro-caspase-1 (p45), pro-IL-1 $\beta$ , NLRP3 and ASC in the whole cell lysate (WCL); cleaved IL-1 $\beta$  (p17) in the culture SN of BMDMs were shown. Coomassie Blue staining was used as the SN loading control, while lamin B was used as the lysate loading control. IL-1 $\beta$  secretion (H) in the supernatant were measured by ELISA.

Data information: Error bars, mean  $\pm$  SEM from three biological replicates. \*\* $P$  < 0.01, \*\*\* $P$  < 0.001 and n.s.: not significant (one-way ANOVA with Dunnett's *post hoc* test).

Source data are available online for this figure.

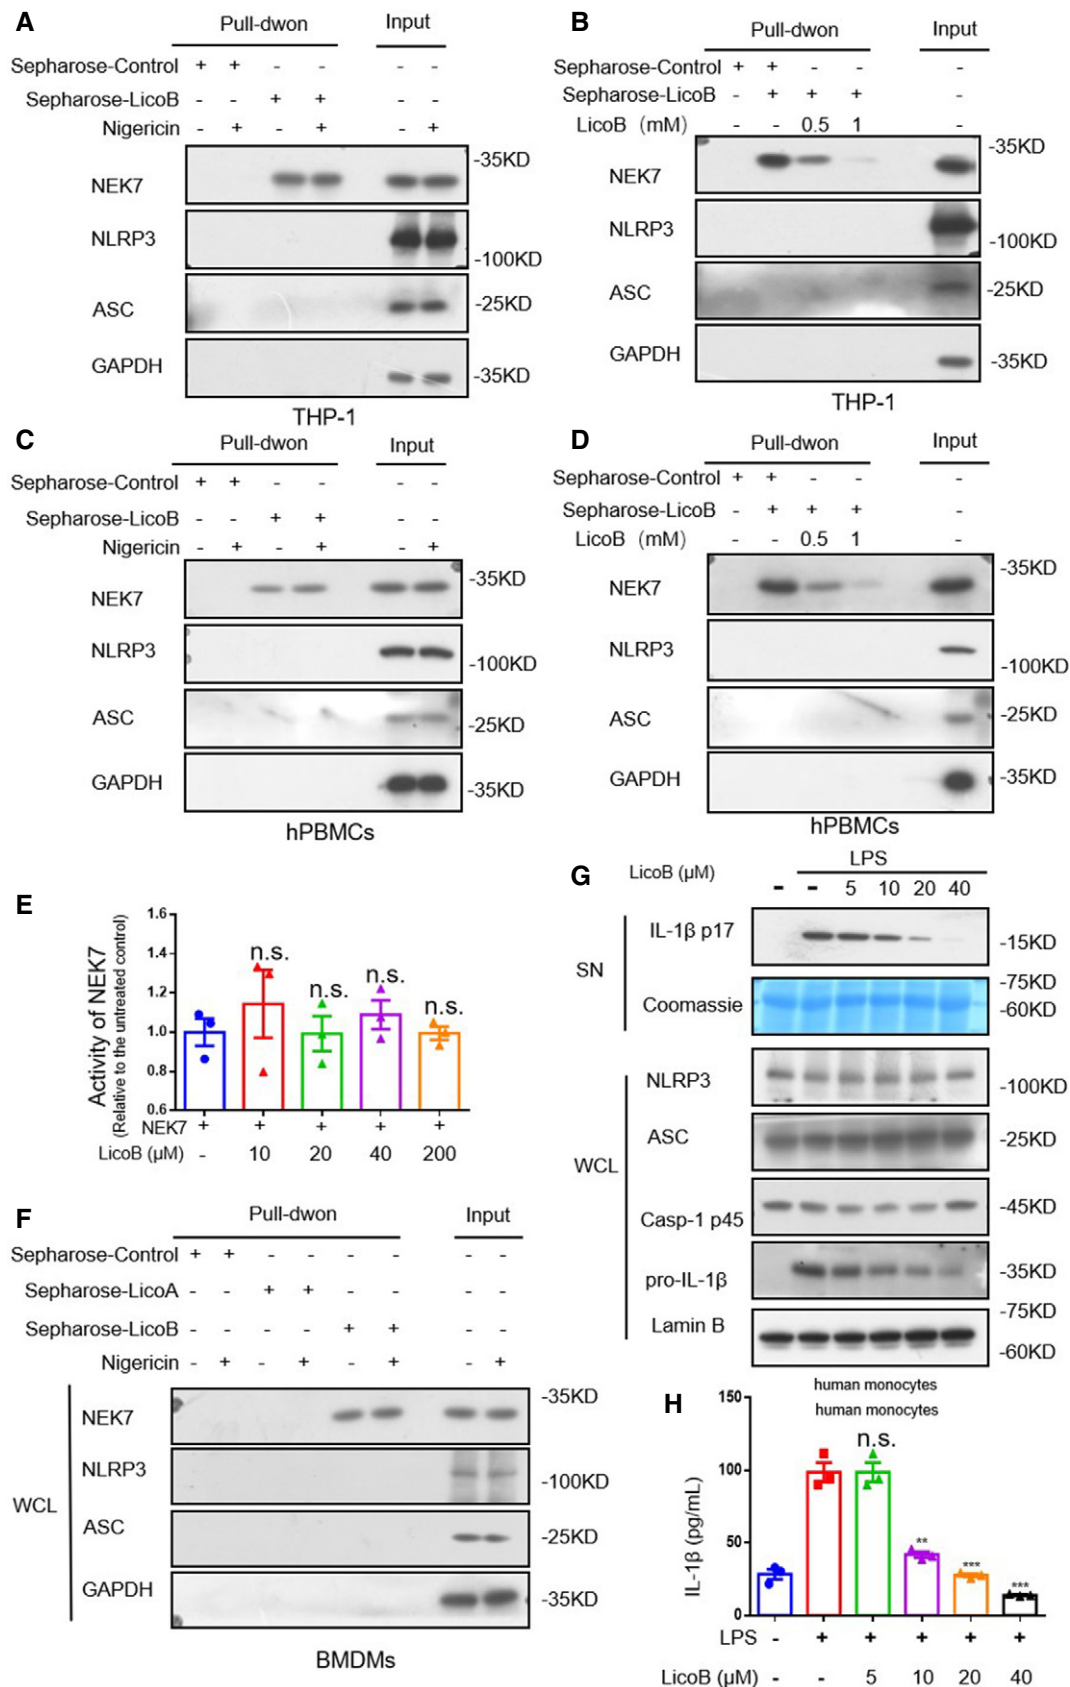

Figure EV3.
