# Supplementary material
Source: PubMed Central journal article supplement (PMC8811655)

Full unedited gel for Figure 2A

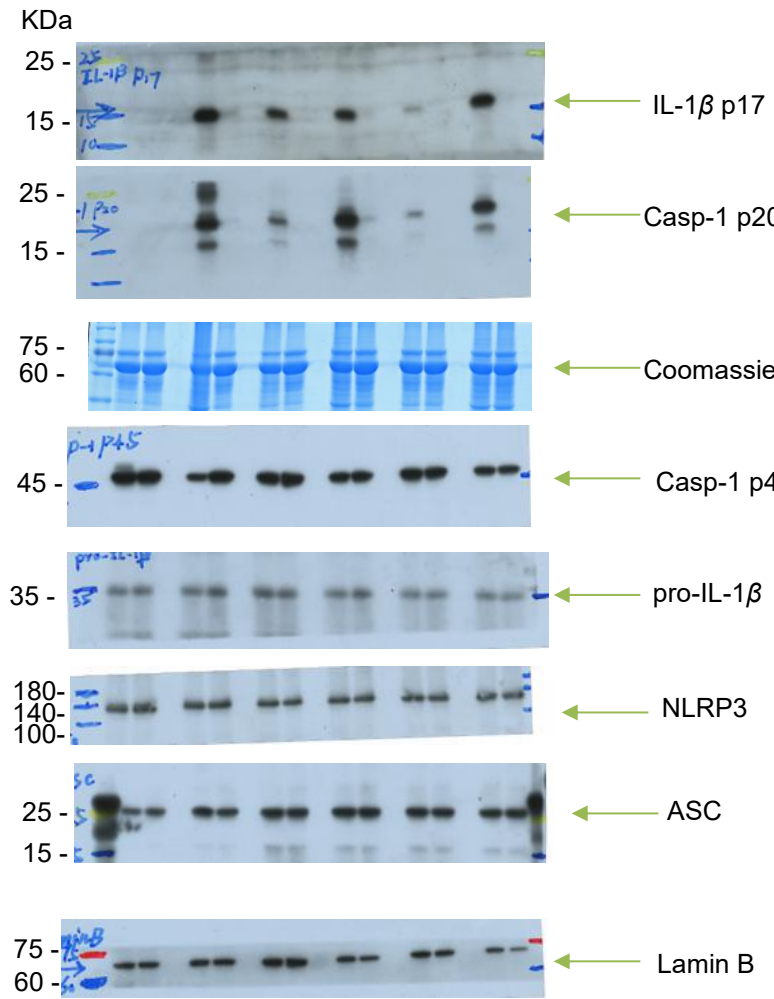

Full unedited gel for Figure 2D

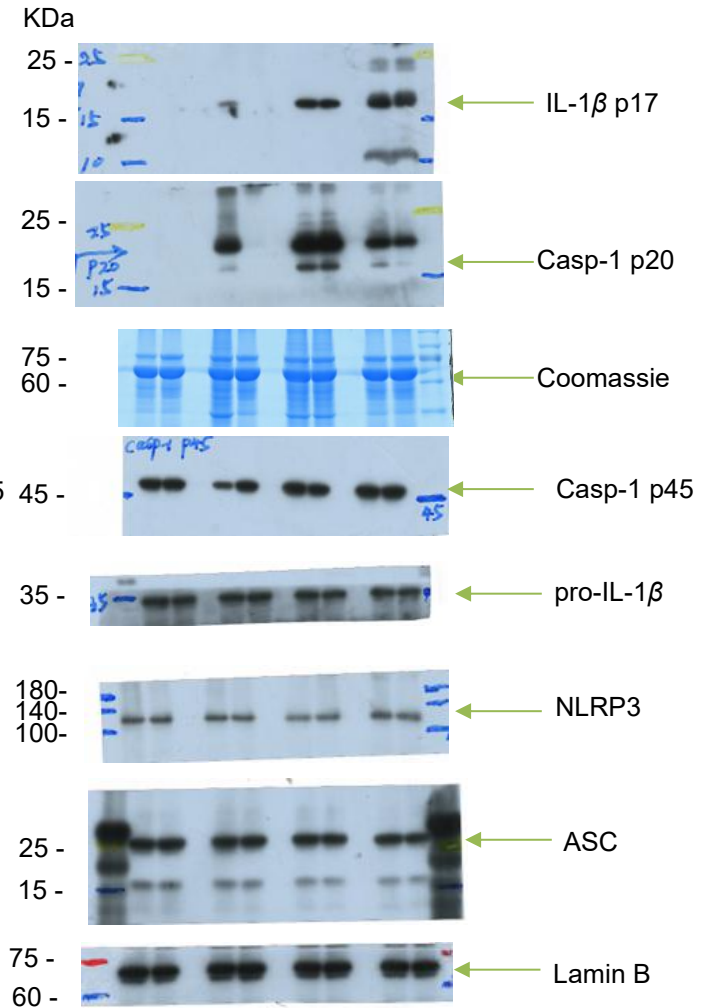

Supplement: EMBR-23-e53499-s001.pdf [file EMBR-23-e53499-s001.pdf]

**Full unedited gel for Figure 7D**

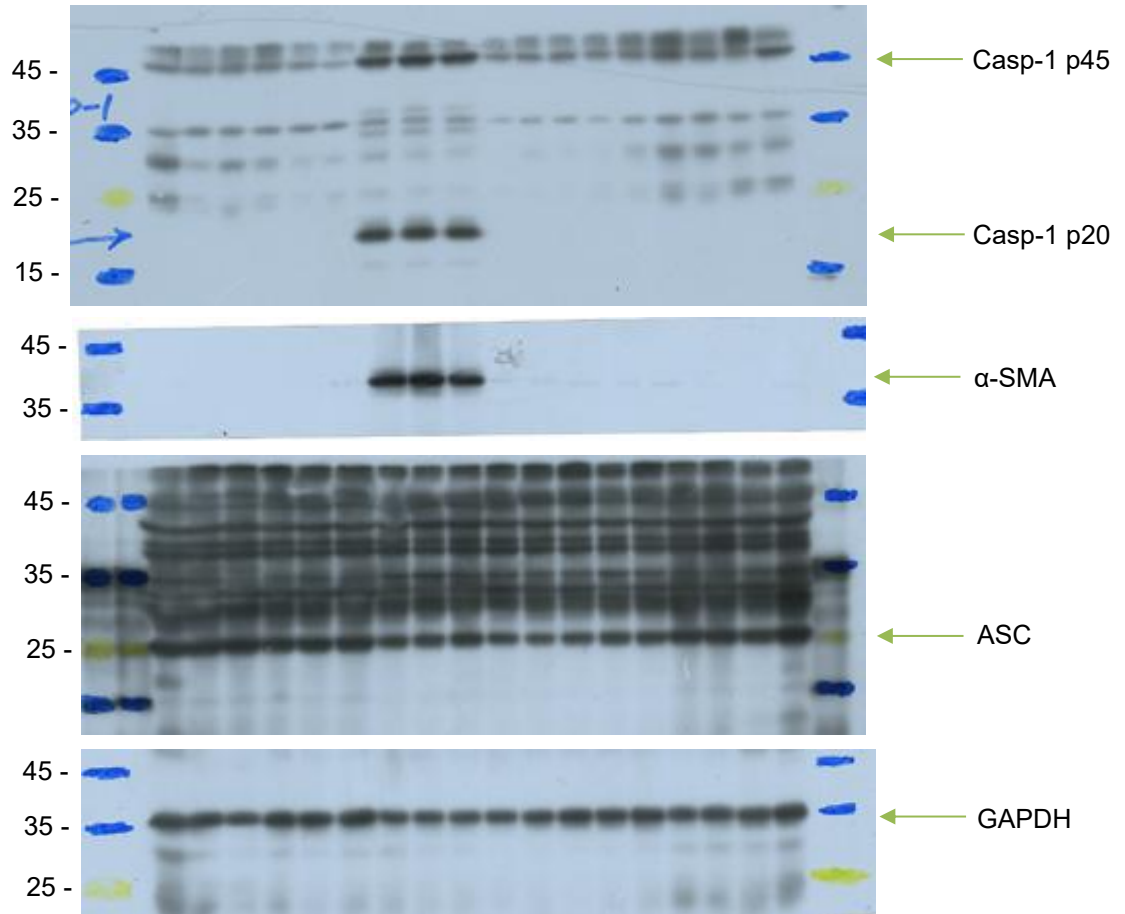

Supplement: EMBR-23-e53499-s002.pdf [file EMBR-23-e53499-s002.pdf]

### Full unedited gel for Figure 3D

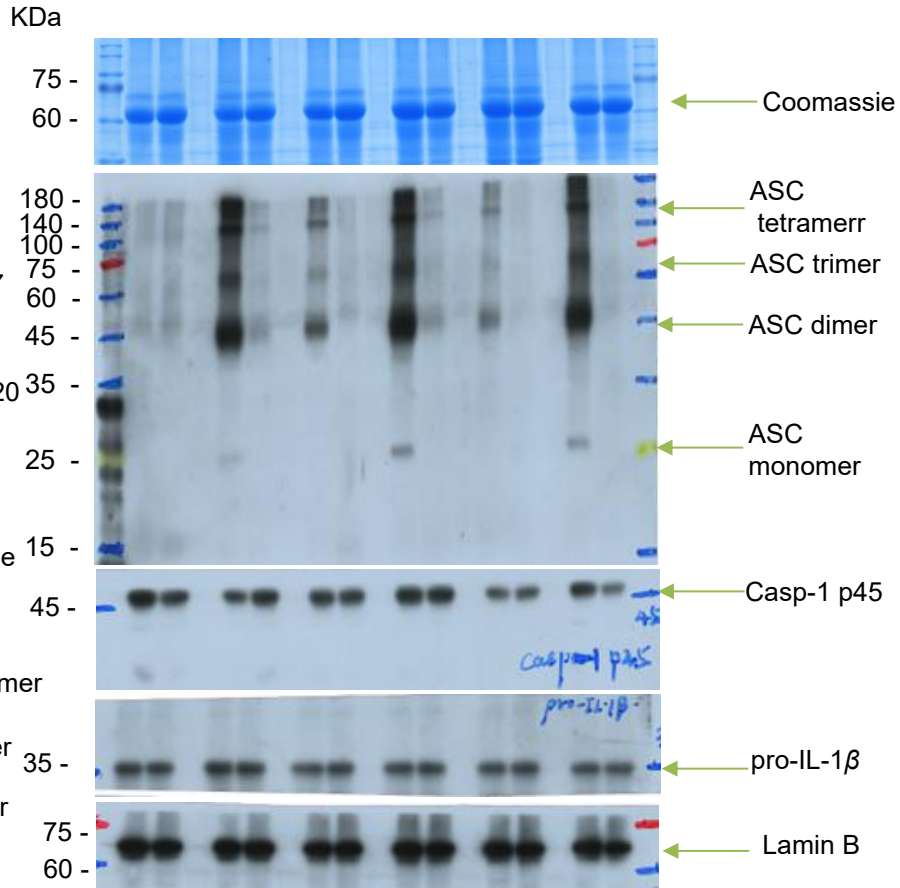

### Full unedited gel for Figure 3A

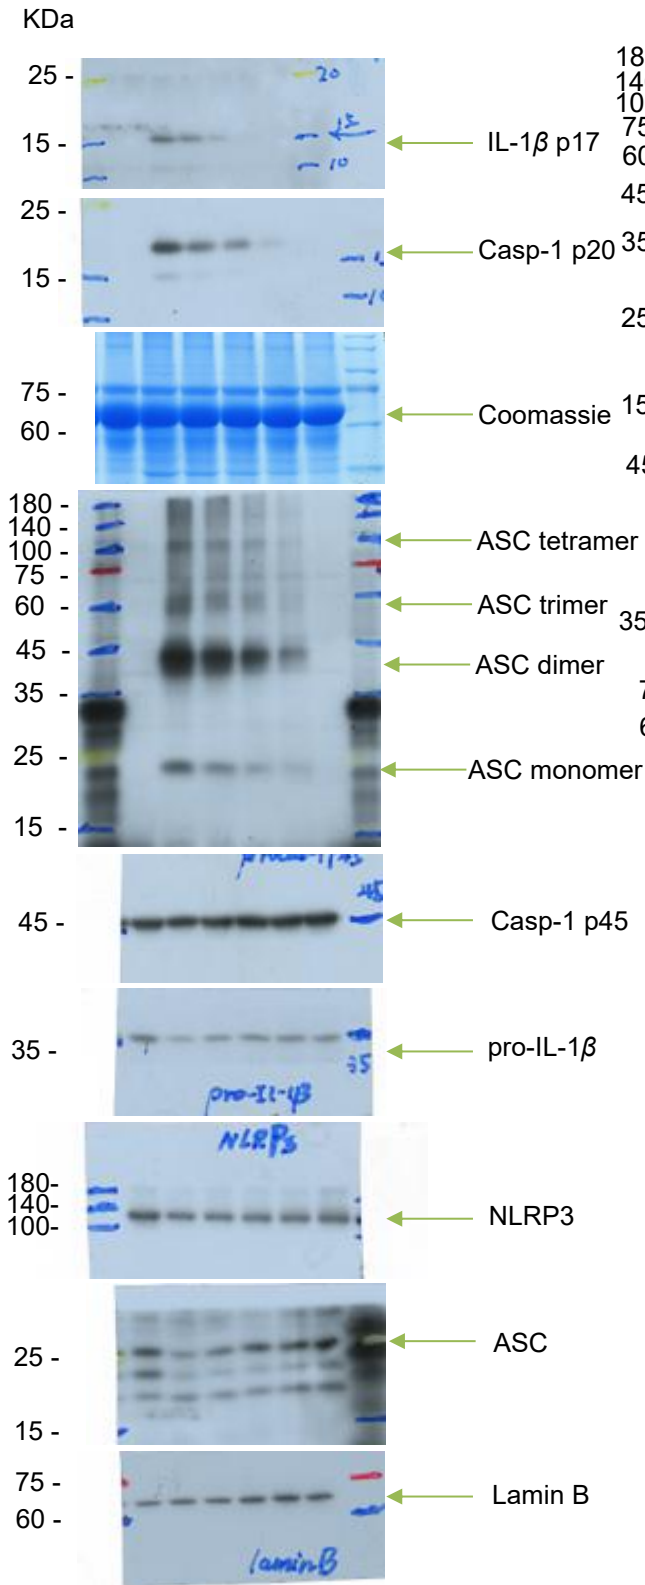

### Full unedited gel for Figure 3E

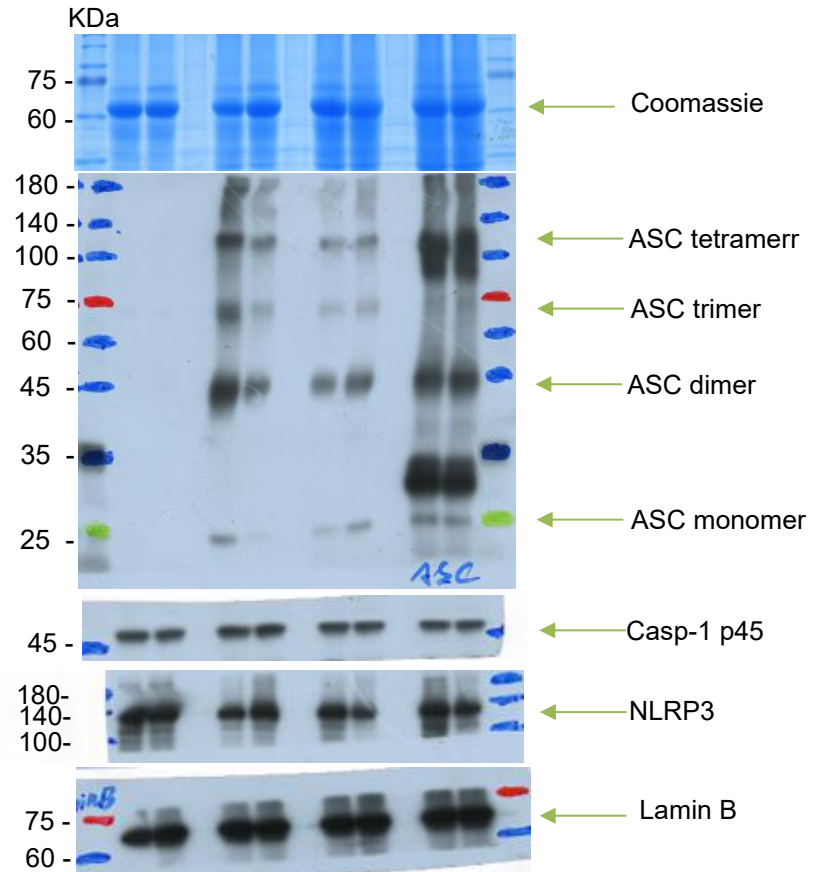

Supplement: EMBR-23-e53499-s005.pdf [file EMBR-23-e53499-s005.pdf]

### Full unedited gel for Figure 1C

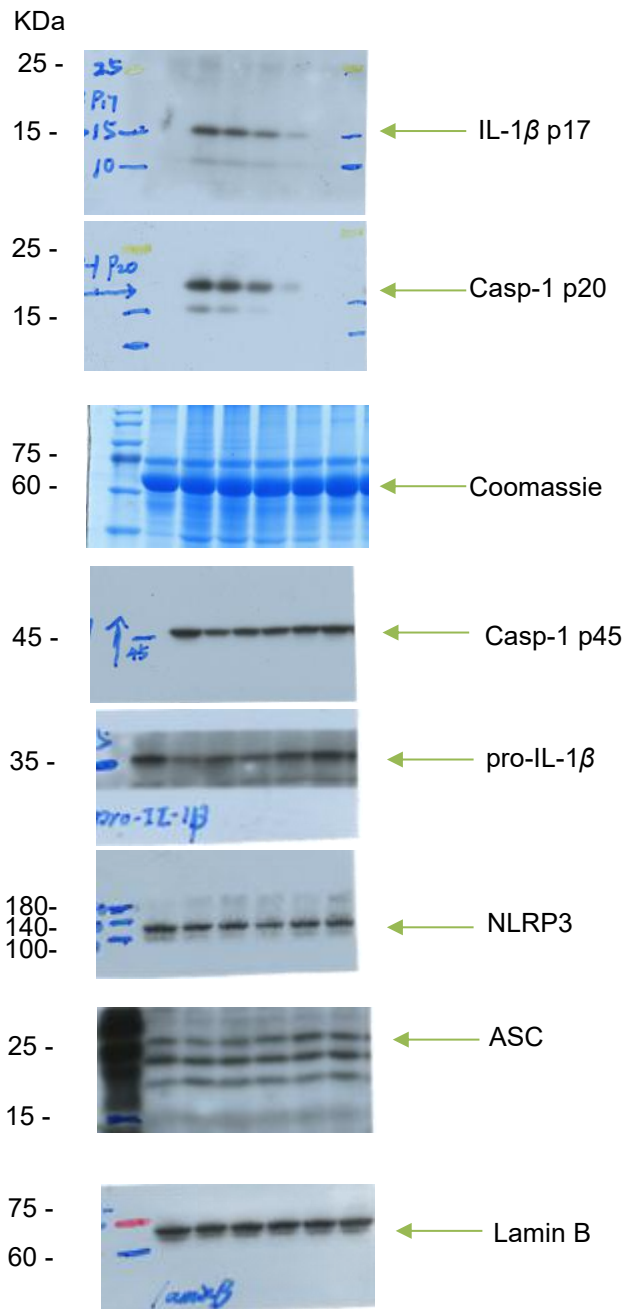

### Full unedited gel for Figure 1G

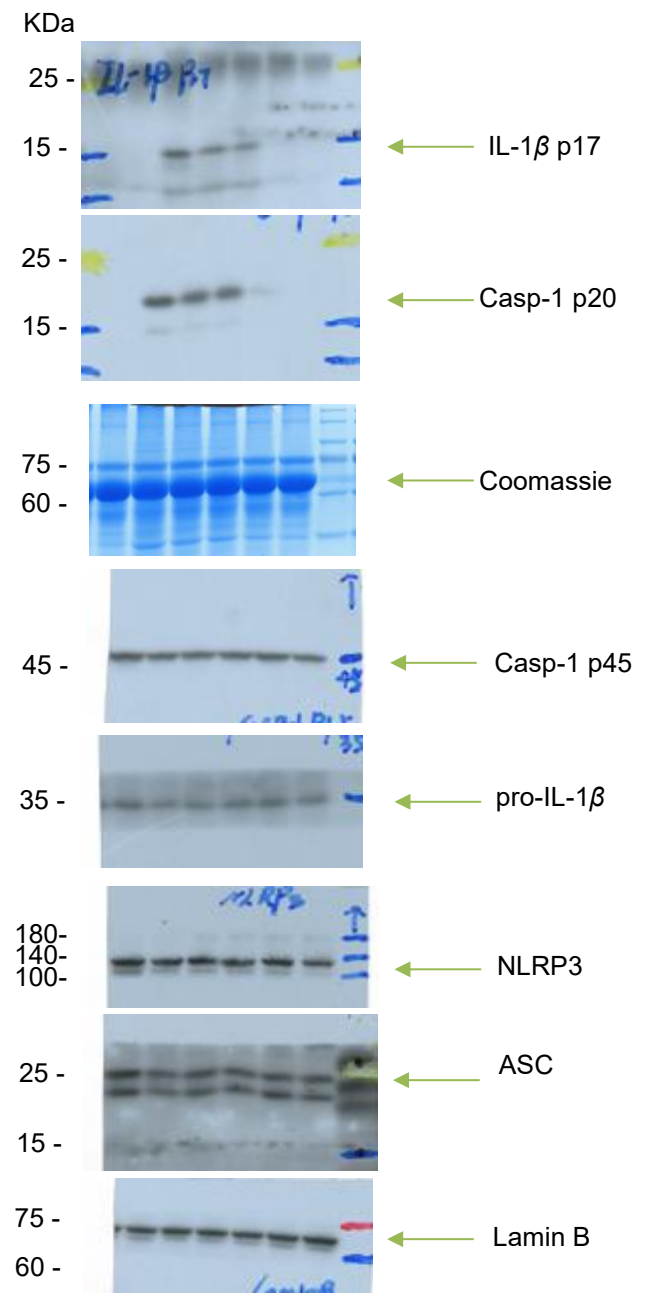

Supplement: EMBR-23-e53499-s008.pdf [file EMBR-23-e53499-s008.pdf]
